# Supplementary material for: Specific Antibodies Induced by Immunization with Hepatitis B Virus-Like Particles Carrying Hepatitis C Virus Envelope Glycoprotein 2 Epitopes Show Differential Neutralization Efficiency
Source: MDPI journal article supplement (doi:10.3390/vaccines8020294), 2020-06-10
Supplement: s1 [file s1]

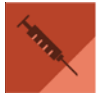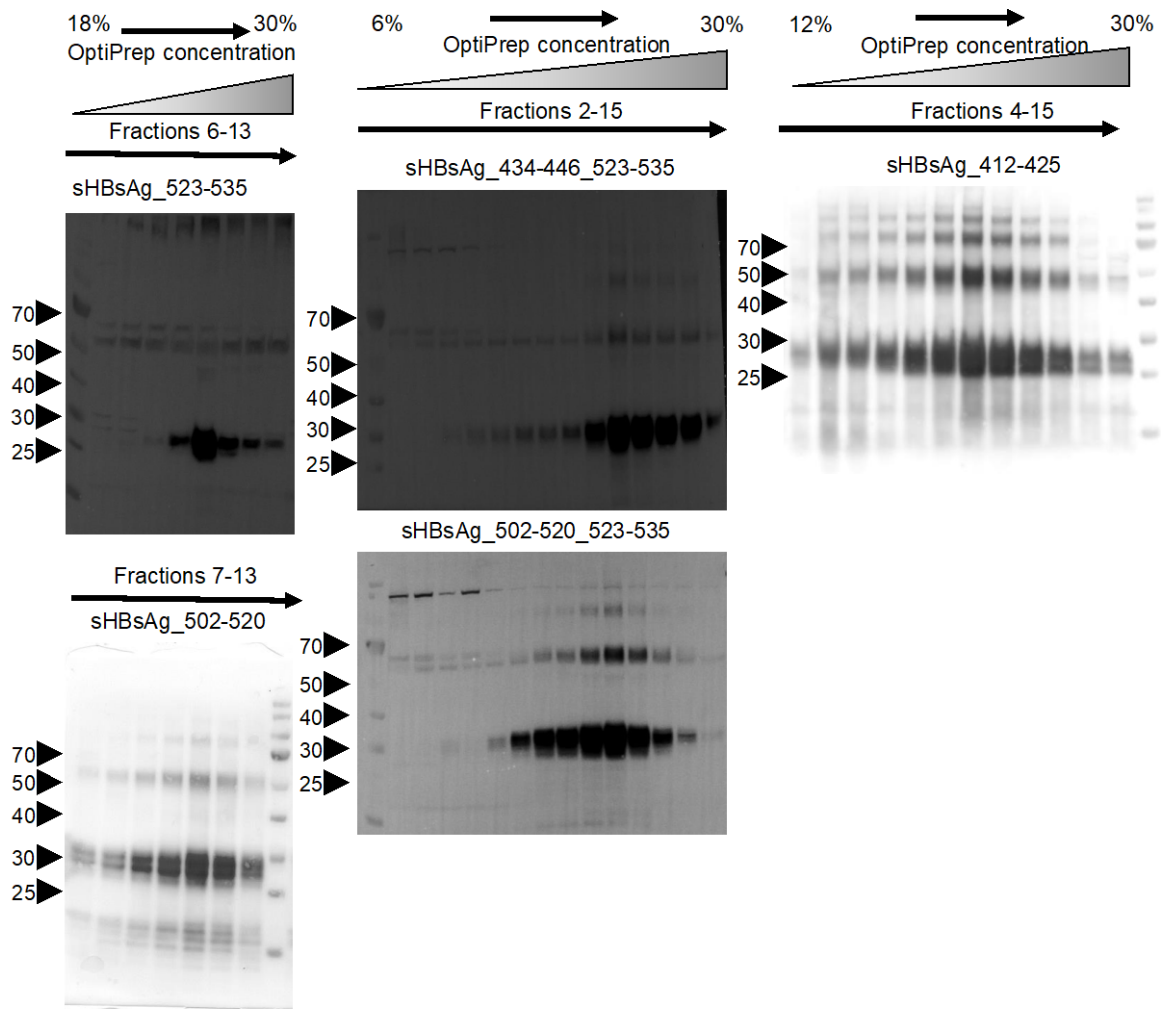

**Figure S1.** OptiPrep density gradient lysates from the *L. tarentolae* cell cultures expressing chimeric proteins. Seventeen fractions of 0.5 mL were harvested from top to bottom. The aliquots were then analyzed using western blot with anti-HBsAg antibodies. On the left, protein ladder, the molecular weight in kDa is given.
